# Supplementary material
Source: publisher site journal article supplement (https://www.dovepress.com/article/237580)

**Supplementary Fig. 1 Knockdown of CRNDE did not affect 5-FU resistance in CRC cells.** (A and B) Cell viability was assessed using MTT assay in SW480 and SW620 cells transfected with si-NC or si-CRNDE and treated with the different concentrations of 5-FU.

**Supplementary Fig. 2 Knockdown of CRNDE suppressed proliferation of CRC cells.** (A and B) Cell proliferation was analyzed by trypan blue staining assay in SW480 and SW620 cells transfected with si-NC or si-CRNDE. \* $P < 0.05$ .

**Supplementary Fig. 3 Knockdown of CRNDE inhibited migration and invasion in CRC cells.** (A) The protein levels of migration and invasion-related proteins (E-cadherin, vimentin and MMP9) were detected by western blot in SW480 and SW620 cells transfected with si-NC or si-CRNDE. \* $P < 0.05$ .

**A**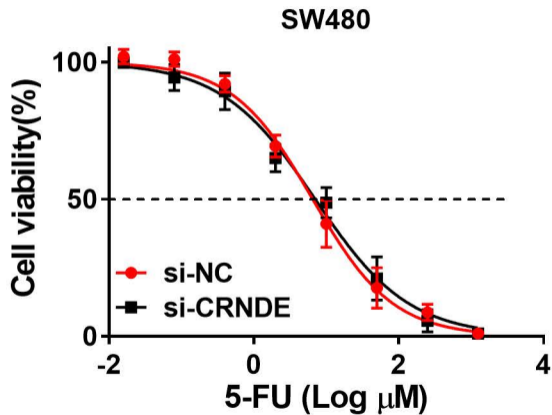**B**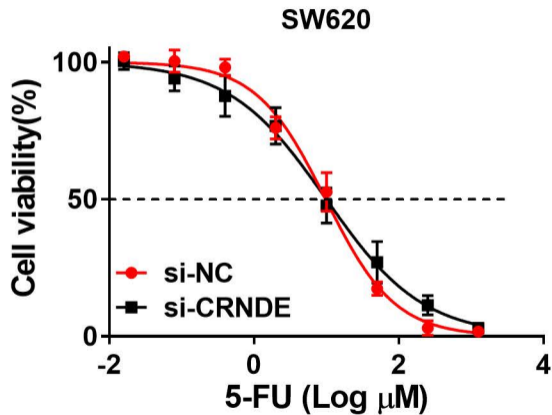

**A**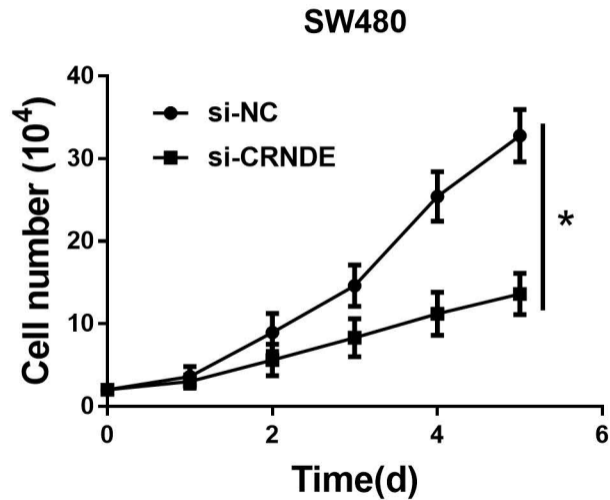**B**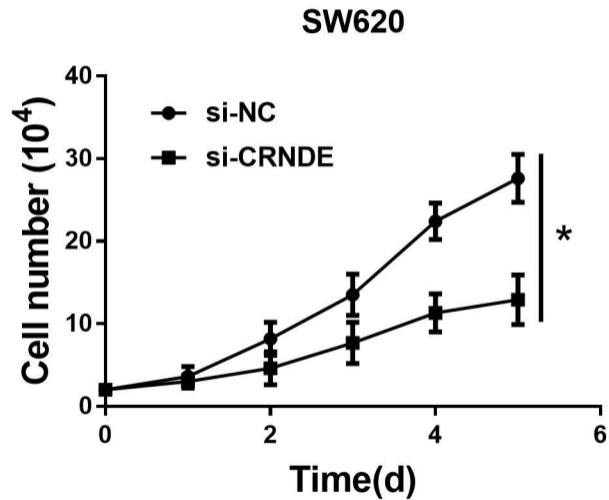

**A**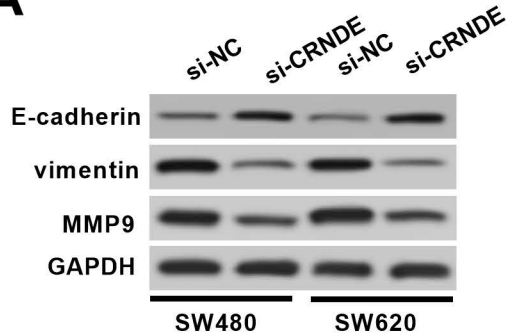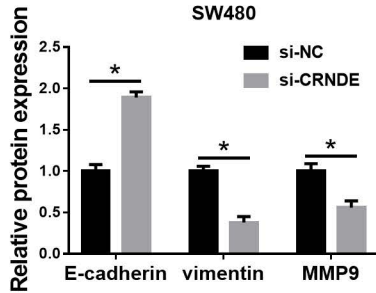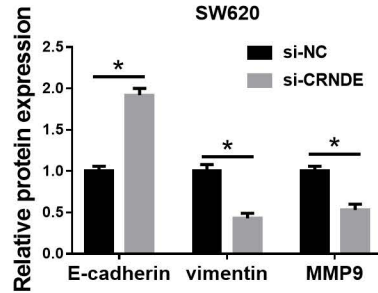

Supplement: Supplementary file 1 [file get_supplementary_file.php]
